# Supplementary material
Source: PubMed Central journal article supplement (PMC540058)
Supplement: nar_33_suppl-1_D567__1.pdf [file nar_33_suppl-1_D567__1.pdf]

## Supplementary Material

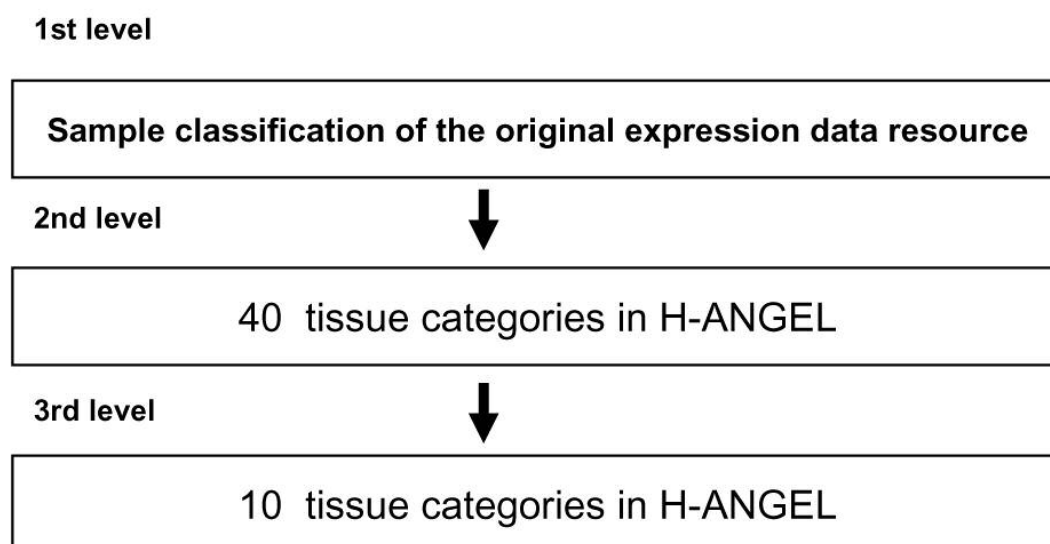

**Figure S1A.** Pipeline of the anatomical categorization method. In the first level, each provider categorized their expression data into their initial category. In the second and third levels, expression data were allocated to the tissue categories of H-ANGEL.
