# Supplementary material
Source: PubMed Central journal article supplement (PMC540058)
Supplement: nar_33_suppl-1_D567__2.pdf [file nar_33_suppl-1_D567__2.pdf]

## Supplementary Material

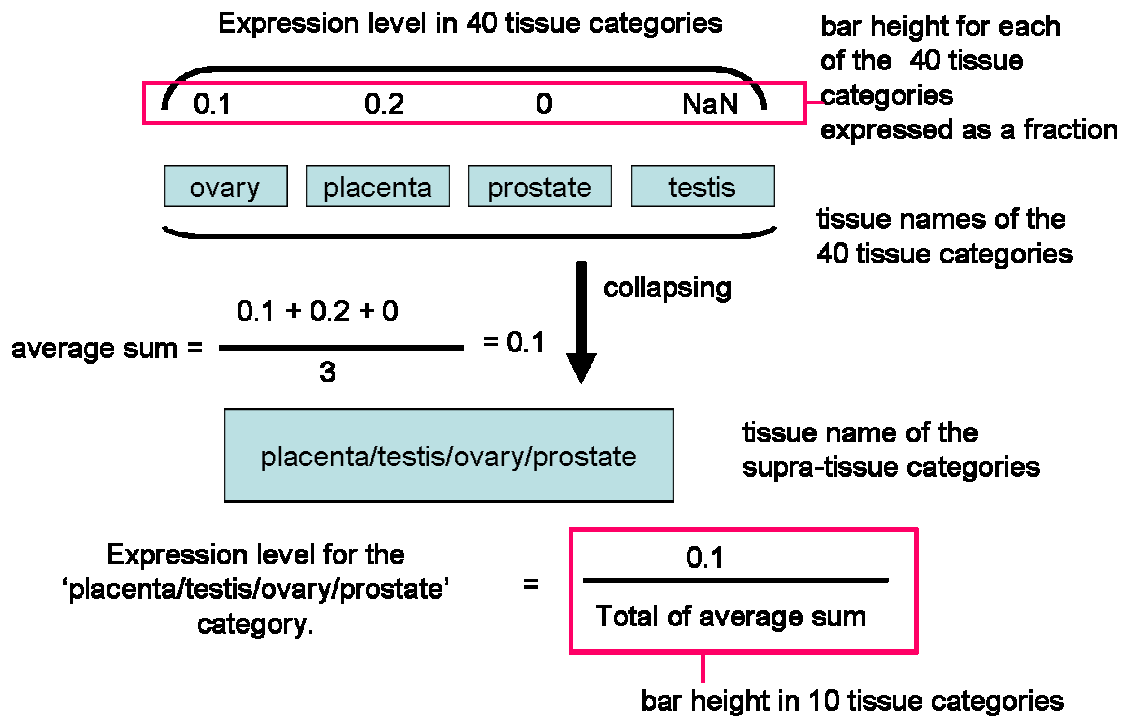

**Figure S1B.** We normalized the relative values of expression in order to make the sum total of expression across 40 tissues equal to 1. Among the datasets used, none of the platforms covers all 40 tissue categories except for EST and BodyMap-EST. For each of these 10 tissue categories/supra-tissue categories, we calculated the average sum of expression for the related tissues in that group. In this example, we show the averaged ratio of gene expression level for placenta, testis, ovary and prostate. In cases where expression data was unavailable for a tissue type included in a supra-category (NaN [Not a number]) we did not include that tissue in the final calculation. As you can see in this example even though the reproductive tissue supra group contains 4 tissues, no expression data analysis was performed for testis in this platform, so the total sum of expression is divided by 3 not 4.
