# Supplementary material
Source: PubMed Central journal article supplement (PMC540058)
Supplement: nar_33_suppl-1_D567__3.pdf [file nar_33_suppl-1_D567__3.pdf]

## Supplementary Material

### H-Inv Locus Search for Gene Expression

Using this option the user may retrieve the gene expression patterns associated with a particular locus across different tissues and platforms by entering a related identifiers in the text box below. Gene expression patterns for distinct loci can be retrieved simultaneously by entering a list of identifiers. Any of the following identifiers or keywords may be used to search:

HIX (H-Inv locus ID), ACC\_NO (Genbank ID), UniGene ID, LocusLink ID, OMIM ID, Definition (Genbank), and Product (Genbank)

Your Query = [ KCNK4 ]

Results

HIX0009761:Homo sapiens potassium channel, subfamily K, member 4 (KCNK4),

**Figure S2A.** Querying the ‘H-Inv Locus Search for Gene Expression’ interface. The upper panel is a screenshot of the ‘H-Inv Locus Search for Gene Expression’ section of the H-ANGEL home page, including the description of all possible queries. In this example, selecting the ‘Definition’ option and querying the database for the ‘KCNK4’ gene symbol, the user will access the result’s web page after clicking on the ‘Submit’ button. The lower panel is a screenshot of the ‘Display H-Inv Cluster ID Box’. By clicking on the ‘Display’ button shown in this panel, the user can see the expression pattern(s) of the locus/loci (see Figure S2B).
