# Supplementary material
Source: PubMed Central journal article supplement (PMC540058)
Supplement: nar_33_suppl-1_D567__4.pdf [file nar_33_suppl-1_D567__4.pdf]

## Supplementary Material

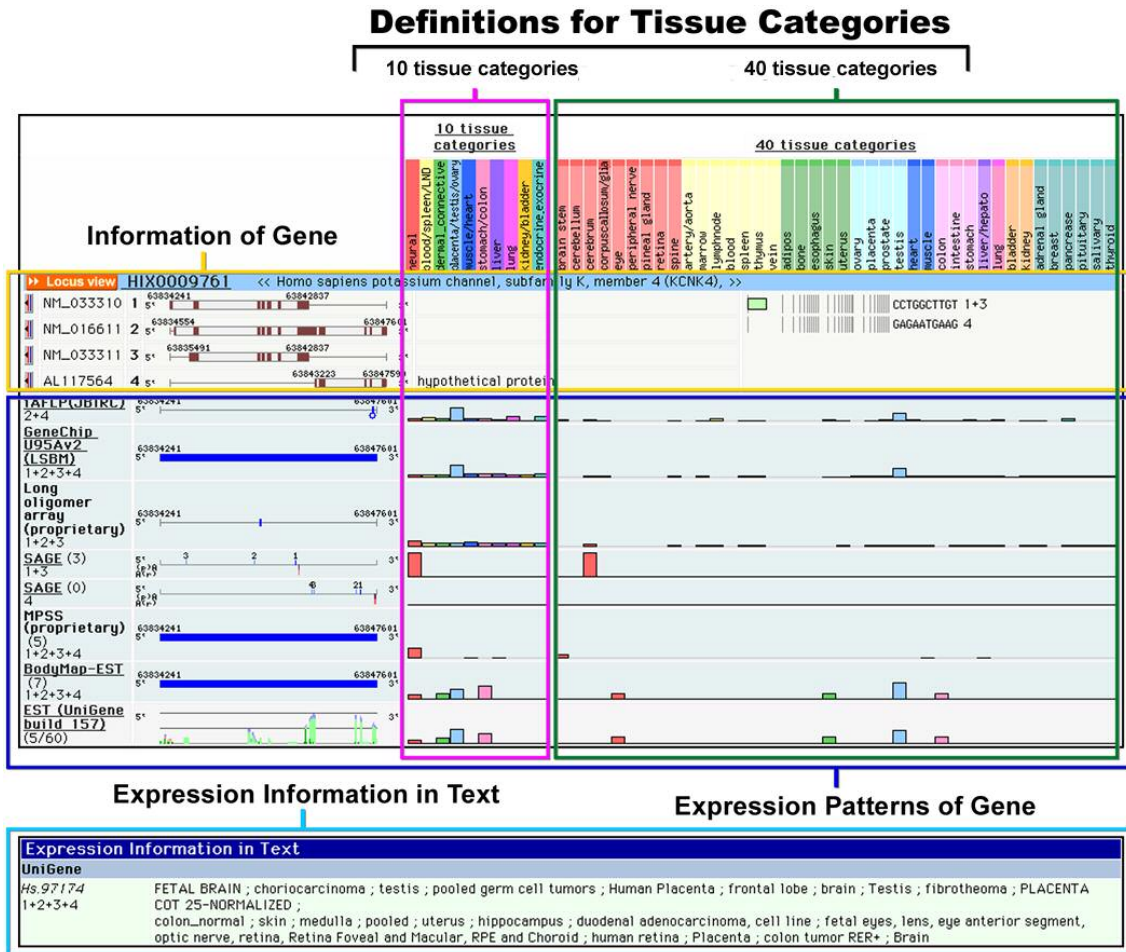

**Figure S2B.** A detailed view of the ‘Expression Pattern View’ section separated three sub sections for an H-Inv locus. In the ‘Gene Information’ column, the clones within the HIX cluster are shown with the intron-exon structure and accession number of Genbank or RefSeq information. In the ‘Expression Pattern of Gene’ below, all the H-ANGEL data related to this HIX number are listed with the name of the platform that provides these data. In the right side of this section, gene expression levels are shown as a histogram according to the tissue categories shown in ‘Definitions for Tissue

Categories'. The bottom panel shows the information in text from UniGene or iAFLP.
